# Supplementary material
Source: PubMed Central journal article supplement (PMC6347537)
Supplement: NIHMS985789-supplement-Supp_figS1-2.pdf [file NIHMS985789-supplement-Supp_figS1-2.pdf]

# Supporting Information Figure S1 and Figure S2

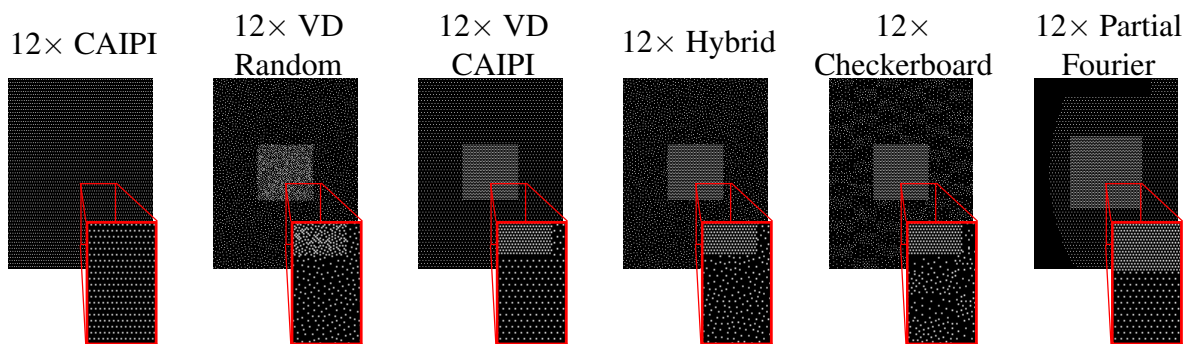

Figure S1: Different 12x accelerated sampling patterns used with Dataset 2. (This figure contains high resolution detail that may not print clearly on certain printers. Readers may prefer to view the electronic version of this figure.)

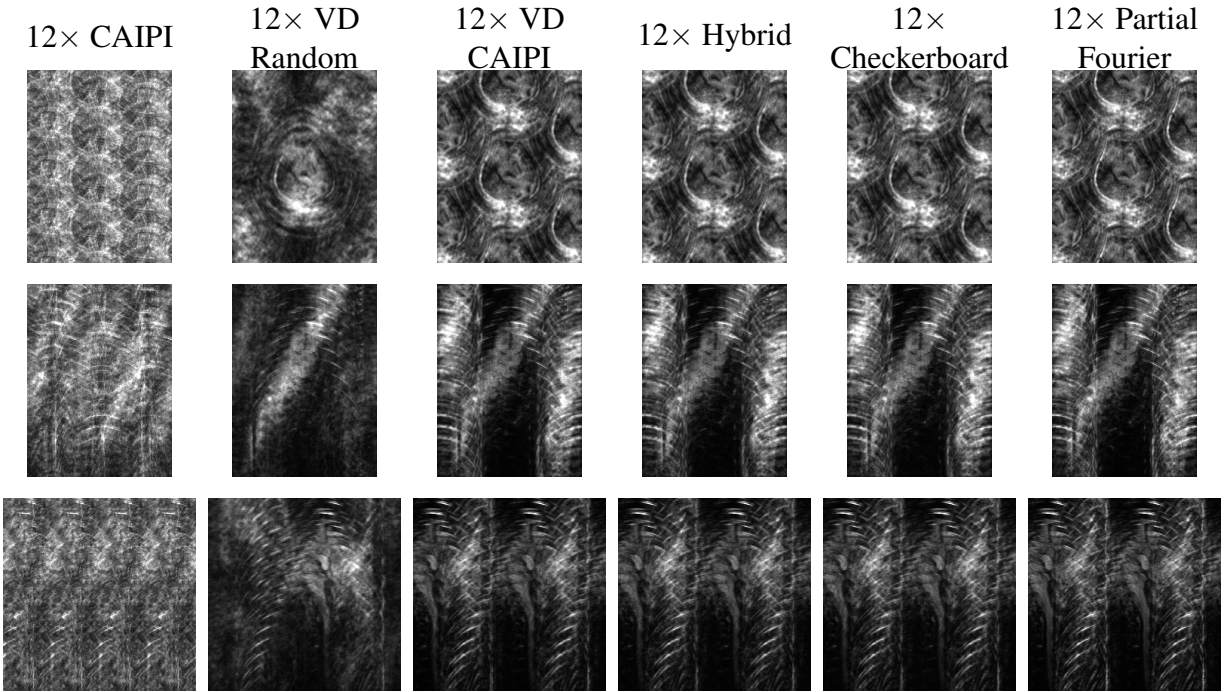

Figure S2: Images showing the 3D aliasing patterns corresponding to the sampling patterns from Fig. S1 for Dataset 2. We show (top row) axial, (middle row) coronal, and (bottom row) sagittal views that are matched to the 3 orthogonal views shown in Fig. 1.
